# Supplementary material for: “I think this is maybe our Achilles heel…” exploring GPs’ responses to young people presenting with emotional distress in general practice: a qualitative study
Source: HighWire-hosted journal article supplement (doi:10.1136/bmjopen-2013-002927), 2013-09-01
Supplement: bmjopen-2013-002927supp_appendix.pdf [file bmjopen-2013-002927supp_appendix.pdf]

## Appendix 1 Early Topic Guide

1. I'd like to talk about your experiences of consulting with young people in general
  - How do you find this age group?
  - Is it very different to consulting with older patients?
  - What sort of problems do you see? Do they consult often?
  
2. Can we talk more about consulting with young people who may have psychological/mental health problems
  - How do you find this clinical area?
  - What about seeing YP alone/ with 'another'?
  - Any areas particularly tricky to broach ?
  
3. How do you consider possible 'mental health problems' which presenting in young people ?
  - Do any examples come to mind ?
  - What approach did you take
  - What worked well? What was difficult?
  
  - Is it different with other age groups
  
4. What are your thoughts on 'depression' and 'anxiety' in young people ?
  - Do you see much of it?
  - Does this differ from other age groups?
  - What options are there in primary care?
  
5. Do you think GPs have a role/or not in promoting emotional well-being in young people? Explore
